# Supplementary material for: LIFEStyle, Prevention and Risk of Acute PaNcreatitis (LIFESPAN): protocol of a multicentre and multinational observational case–control study
Source: PubMed Central journal article supplement — BMJ Open. 2020 Jan 6;10(1):e029660. doi: 10.1136/bmjopen-2019-029660 (PMC6955557; doi:10.1136/bmjopen-2019-029660), 2020-01-06
Supplement: bmjopen-2019-029660supp001.pdf [file bmjopen-2019-029660supp001.pdf]

|                         | STUDY PERIOD |                |           |
|-------------------------|--------------|----------------|-----------|
|                         | Enrolment    | Post enrolment | Close-out |
| TIMEPOINT               | 0            | 0              | &         |
| <b>ENROLMENT:</b>       |              |                |           |
| Eligibility screen      | X            |                |           |
| Informed consent        | X            |                |           |
| <b>QUESTIONNAIRE S:</b> |              | X              |           |
| Questionnaire A         |              | X              |           |
| Questionnaire B         |              | X              |           |
| Questionnaire C         |              | X              |           |
| Questionnaire D         |              | X              |           |
| Questionnaire E         |              | X              |           |
| Questionnaire F         |              | X              |           |
| Questionnaire P         |              | X              |           |
| <b>DATA ANALYSIS:</b>   |              |                | X         |
